# Supplementary material for: Improved Efficacy of Tafasitamab plus Lenalidomide versus Systemic Therapies for Relapsed/Refractory DLBCL: RE-MIND2, an Observational Retrospective Matched Cohort Study
Source: Oxford University Press journal article supplement (doi:10.1158/1078-0432.ccr-21-3648), 2022-05-18
Supplement: ccr-21-3648_supplementary_figures_s1-s2_supps1-s2.docx [file ccr-21-3648_supplementary_figures_s1-s2_supps1-s2.docx]

#
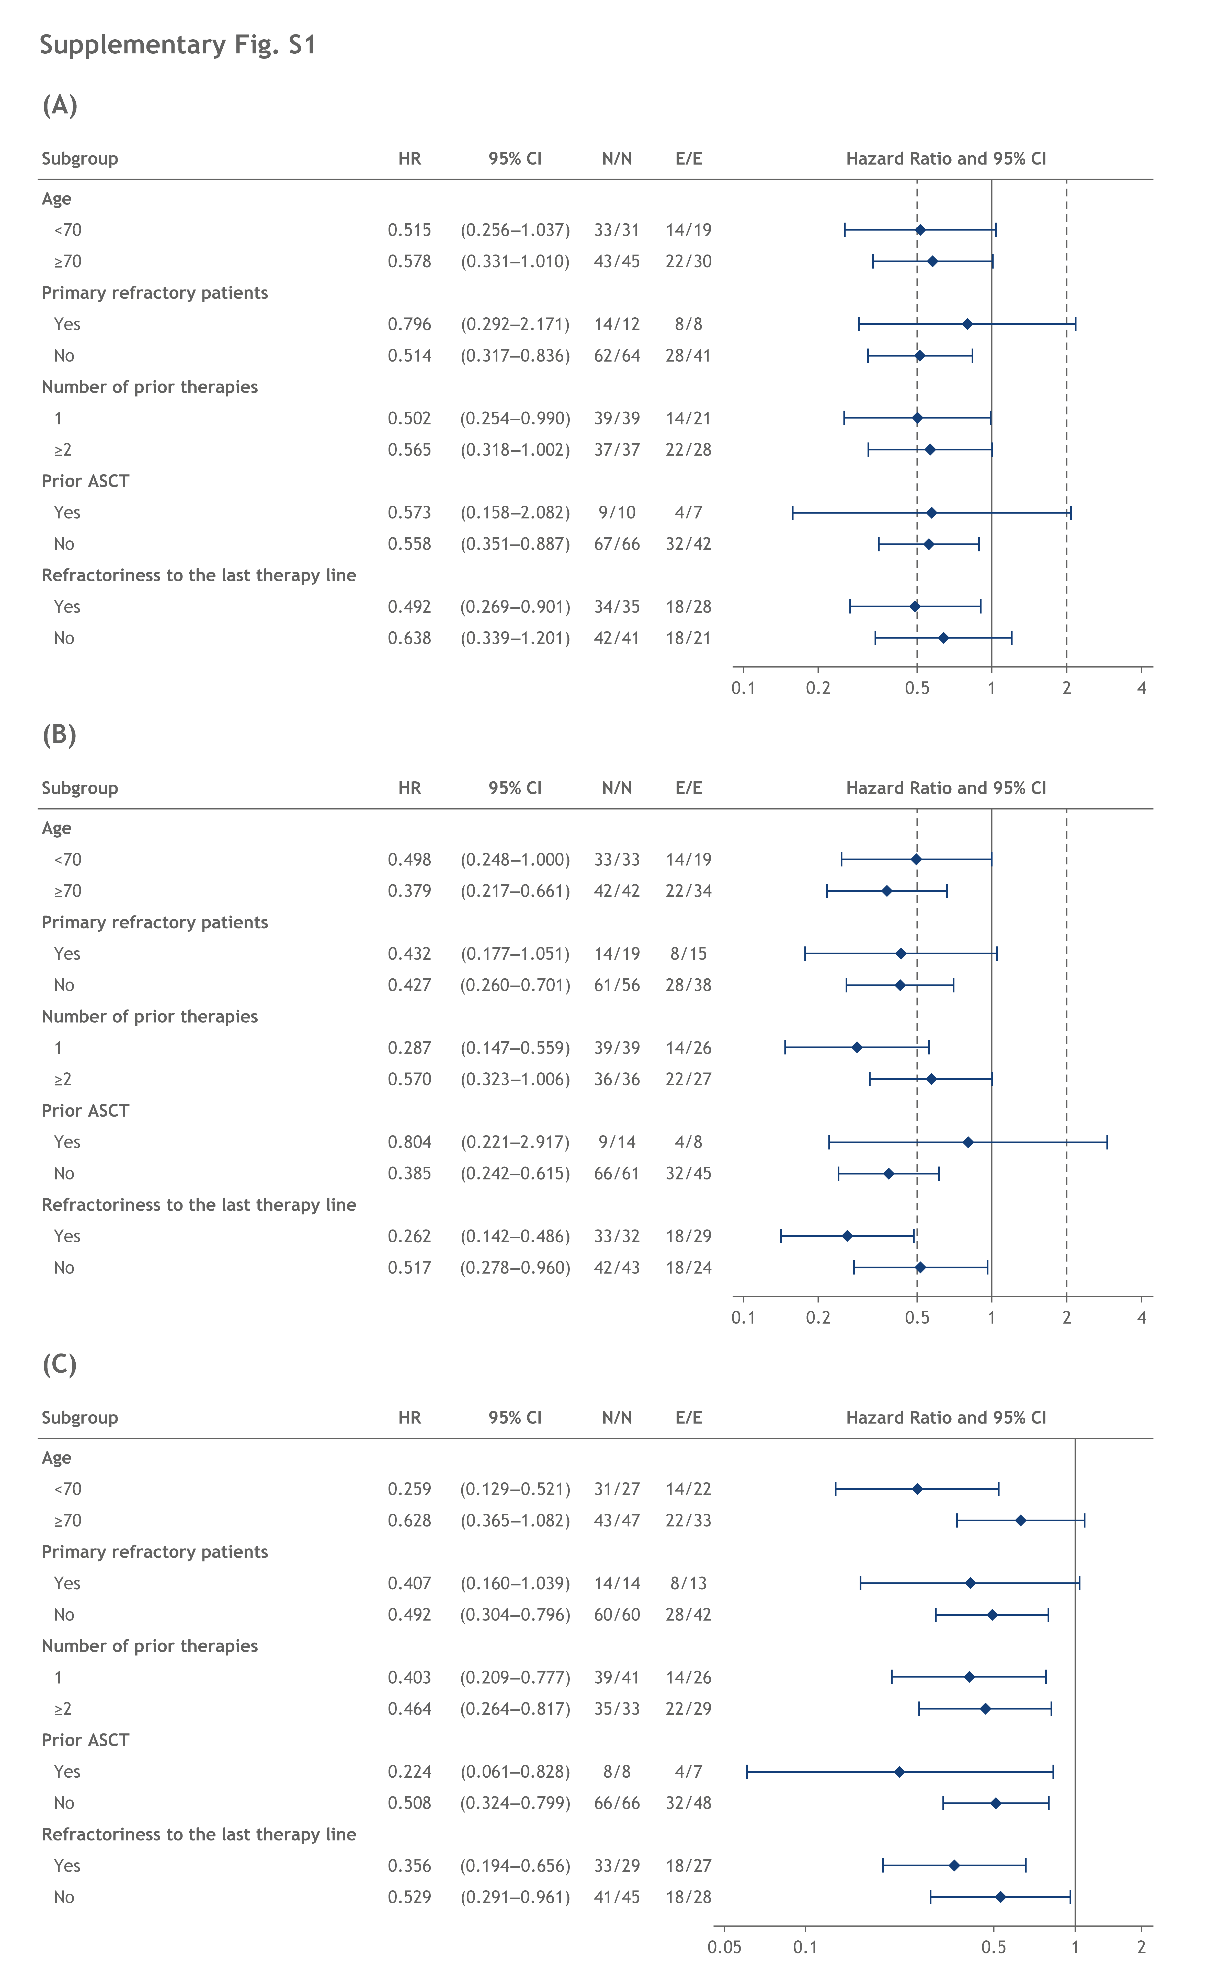


# **Figure S1.** Forest plots for subgroup analyses of OS by age (< 70 vs ≥ 70), primary refractory patients (Yes vs No), number of prior therapies (1 vs ≥ 2), prior ASCT (Yes vs No) and refractoriness by last therapy line (Yes vs No). A: Tafasitamab plus lenalidomide versus systemic therapies pooled. B: Tafasitamab plus lenalidomide versus BR. C: Tafasitamab plus lenalidomide versus R-GemOx. HR < 1 indicates that treatment effect favors the cohort of patients treated by tafasitamab plus lenalidomide. The x-axis of the forest plot is presented in logarithmic scale. CI, confidence interval; HR, hazard ratio; N/N, number of patients in the tafasitamab plus lenalidomide and observational cohort, respectively; E/E, number of events in tafasitamab plus lenalidomide and observational cohort, respectively.


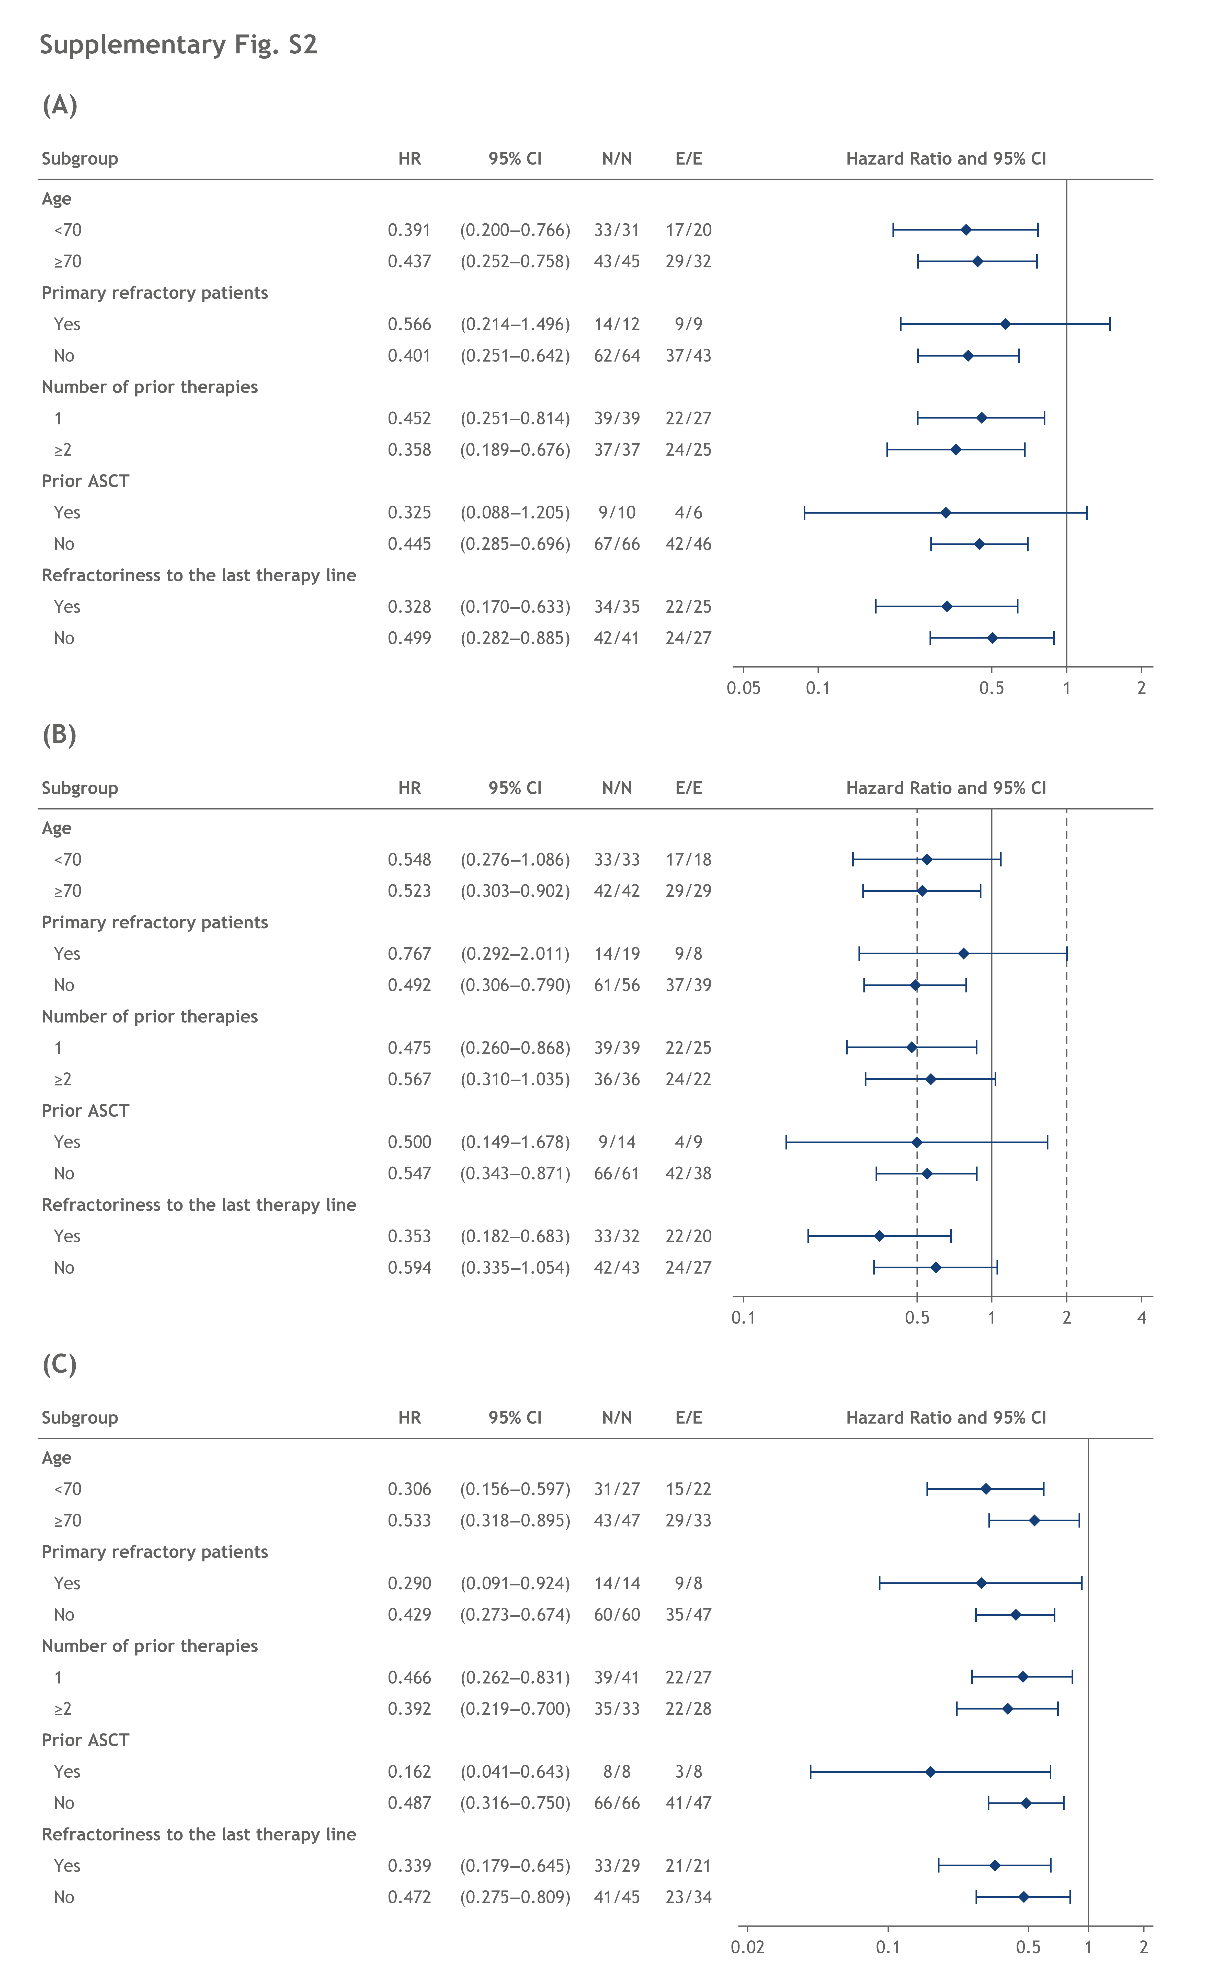


# Figure S2.Forest plots for subgroup analyses of PFS by age (< 70 vs ≥ 70), primary refractory patients (Yes vs No), number of prior therapies (1 vs ≥ 2), prior ASCT (Yes vs No) and refractoriness by last therapy line (Yes vs No). **A**: Tafasitamab plus lenalidomide versus systemic therapies pooled. **B**: Tafasitamab plus lenalidomide versus BR. **C**: Tafasitamab plus lenalidomide versus R-GemOx. HR < 1 indicates that treatment effect favors the cohort of patients treated by tafasitamab plus lenalidomide. The x-axis of the forest plot is presented in logarithmic scale. CI, confidence interval; HR, hazard ratio; N/N, number of patients in the tafasitamab plus lenalidomide and observational cohort, respectively; E/E, number of events in tafasitamab plus lenalidomide and observational cohort, respectively.
